# Supplementary material for: Predictors of Discordance Between Dry Eye Symptoms and Signs: Insights From the Sjögren's International Collaborative Clinical Alliance
Source: PubMed Central journal article supplement — Invest Ophthalmol Vis Sci. 2024 Oct 4;65(12):3. doi: 10.1167/iovs.65.12.3 (PMC11457922; doi:10.1167/iovs.65.12.3), 2024-10-04
Supplement: iovs-65-12-3_s001.pdf [file iovs-65-12-3_s001.pdf]

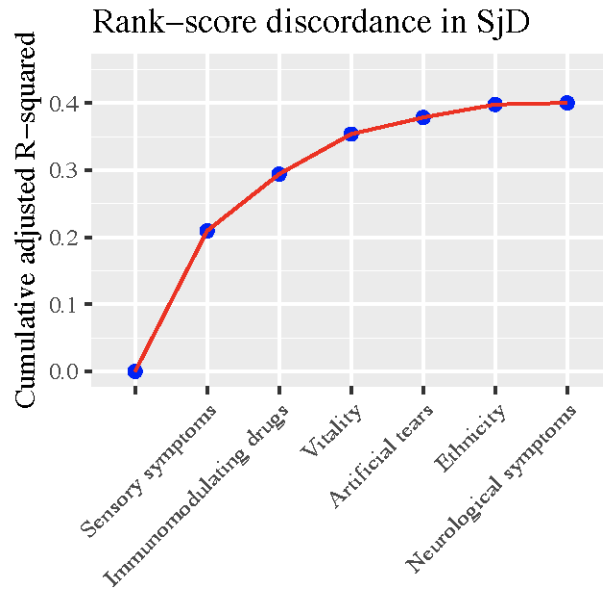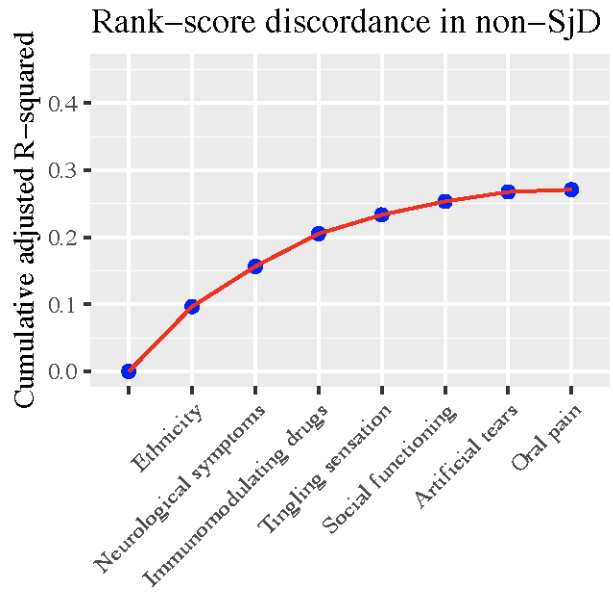

Supplementary Figure 1. Subgroup analysis of rank-score discordance stratified by Sjögren's disease status.

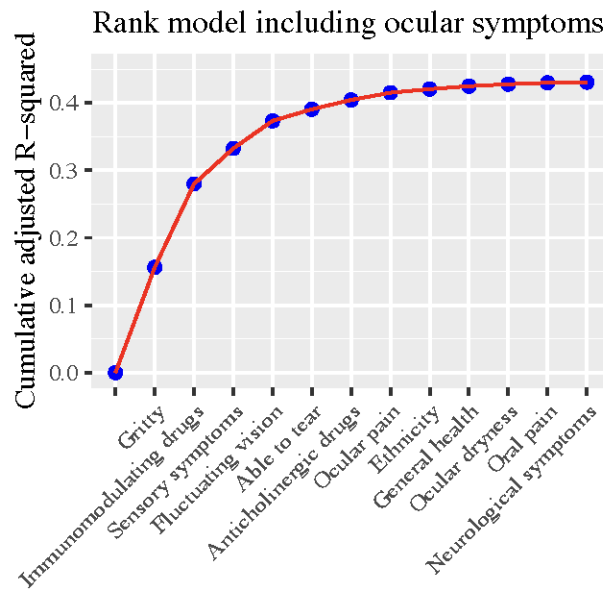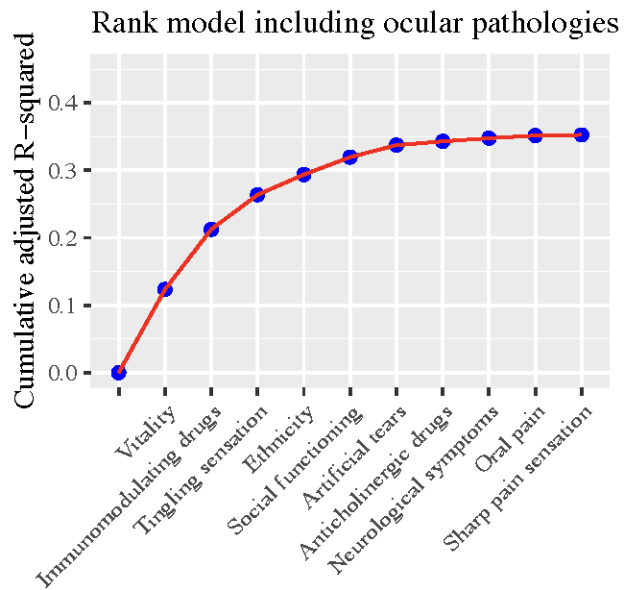

Supplementary Figure 2. Exploratory analysis of rank-score discordance model including (a) ocular symptoms that are not in the OSDI-6 questionnaire, and (b) pathologies identified via slit-lamp examination.
