# Supplementary material for: Predictors of Discordance Between Dry Eye Symptoms and Signs: Insights From the Sjögren's International Collaborative Clinical Alliance
Source: PubMed Central journal article supplement — Invest Ophthalmol Vis Sci. 2024 Oct 4;65(12):3. doi: 10.1167/iovs.65.12.3 (PMC11457922; doi:10.1167/iovs.65.12.3), 2024-10-04
Supplement: iovs-65-12-3_s002.pdf [file iovs-65-12-3_s002.pdf]

Supplementary Table 1. Participants' characteristics in the training and testing datasets.

| Characteristics              | Training dataset<br>(n = 2764) | Testing dataset<br>(n = 691) |
|------------------------------|--------------------------------|------------------------------|
| <b>Demographics</b>          |                                |                              |
| Age                          | 53.0 (13.3)                    | 52.9 (13.0)                  |
| Gender                       |                                |                              |
| Female                       | 2521 (91.2%)                   | 630 (91.2%)                  |
| Male                         | 243 (8.8%)                     | 61 (8.8%)                    |
| Site                         |                                |                              |
| America                      | 1363 (49.3%)                   | 338 (48.9%)                  |
| Asia                         | 682 (24.7%)                    | 172 (24.9%)                  |
| Europe                       | 719 (26.0%)                    | 181 (26.2%)                  |
| Ethnicity                    |                                |                              |
| Asian                        | 782 (28.3%)                    | 190 (27.5%)                  |
| White                        | 387 (14.0%)                    | 101 (14.6%)                  |
| Others                       | 1595 (57.7%)                   | 400 (57.9%)                  |
| Education                    |                                |                              |
| College and above            | 1634 (59.1%)                   | 401 (58.0%)                  |
| High school and below        | 1130 (40.9%)                   | 290 (42.0%)                  |
| Employment                   |                                |                              |
| Not working                  | 1054 (38.1%)                   | 263 (38.1%)                  |
| Working                      | 1709 (61.8%)                   | 428 (61.9%)                  |
| Smoking                      |                                |                              |
| Current                      | 259 (9.4%)                     | 66 (9.6%)                    |
| Ever                         | 848 (30.7%)                    | 230 (33.3%)                  |
| Never                        | 1657 (59.9%)                   | 395 (57.2%)                  |
| Self-reported general health |                                |                              |
| Excellent                    | 46 (1.7%)                      | 18 (2.6%)                    |
| Very Good                    | 403 (14.6%)                    | 96 (13.9%)                   |

|                                            |              |             |
|--------------------------------------------|--------------|-------------|
| Good                                       | 954 (34.5%)  | 235 (34.0%) |
| Fair                                       | 1033 (37.4%) | 262 (37.9%) |
| Poor                                       | 327 (11.8%)  | 80 (11.6%)  |
| <b>Medical history</b>                     |              |             |
| Sjögren's disease                          | 1219 (44.1%) | 298 (43.1%) |
| Any thyroid diseases                       | 493 (17.8%)  | 112 (16.2%) |
| Any liver diseases                         | 95 (3.4%)    | 21 (3.0%)   |
| Any kidney diseases                        | 59 (2.1%)    | 13 (1.9%)   |
| Diabetes                                   | 130 (4.7%)   | 18 (2.6%)   |
| <b>Neuropathic pain</b>                    |              |             |
| Tingling sensation                         | 1156 (41.8%) | 300 (43.4%) |
| Sharp pain sensation                       | 1051 (38.0%) | 246 (35.6%) |
| Pain interference with work                |              |             |
| Not at all                                 | 698 (25.3%)  | 181 (26.2%) |
| A little bit                               | 611 (22.1%)  | 134 (19.4%) |
| Moderately                                 | 591 (21.4%)  | 143 (20.7%) |
| Quite a bit                                | 619 (22.4%)  | 172 (24.9%) |
| Extremely                                  | 244 (8.8%)   | 61 (8.8%)   |
| Oral pain                                  | 463 (16.8%)  | 124 (17.9%) |
| Neuropathic pain score                     | 2.09 (1.70)  | 2.11 (1.75) |
| Any rheumatologic diseases                 | 679 (24.6%)  | 169 (24.5%) |
| Musculoskeletal or nervous system symptoms | 2559 (92.6%) | 647 (93.6%) |
| Any sensory symptoms                       | 1677 (60.7%) | 410 (59.3%) |
| <b>Medication use</b>                      |              |             |
| Artificial tears                           | 1750 (63.3%) | 448 (64.8%) |
| Punctal occlusion                          | 259 (9.4%)   | 67 (9.7%)   |
| Steroid drops                              | 104 (3.8%)   | 29 (4.2%)   |
| Antibiotic drops                           | 159 (5.8%)   | 35 (5.1%)   |

|                                       |              |             |
|---------------------------------------|--------------|-------------|
| Cyclosporine drops                    | 264 (9.6%)   | 72 (10.4%)  |
| Anticholinergic drops                 | 816 (29.5%)  | 227 (32.9%) |
| Thyroid replacement                   | 419 (15.2%)  | 100 (14.5%) |
| Immunomodulating drugs                | 1159 (41.9%) | 293 (42.4%) |
| <b>Health-related quality of life</b> |              |             |
| Physical function                     | 42.8 (12.3)  | 42.6 (12.6) |
| Physical role functioning             | 41.0 (11.6)  | 41.0 (11.7) |
| Bodily pain                           | 40.4 (13.3)  | 40.0 (13.5) |
| General health                        | 37.9 (11.8)  | 38.0 (11.9) |
| Vitality                              | 44.6 (11.6)  | 44.8 (11.9) |
| Social functioning                    | 42.9 (12.3)  | 42.7 (12.6) |
| Emotional role functioning            | 42.6 (12.4)  | 42.4 (12.9) |
| Mental health                         | 45.2 (11.2)  | 44.8 (11.5) |
| PCS                                   | 40.0 (12.1)  | 40.1 (12.2) |
| MCS                                   | 45.2 (11.3)  | 44.9 (11.8) |
| PHQ9                                  |              |             |
| No depression                         | 1062 (38.4%) | 255 (36.9%) |
| Mild depression                       | 744 (26.9%)  | 184 (26.6%) |
| Moderate depression                   | 463 (16.8%)  | 114 (16.5%) |
| Moderately severe depression          | 228 (8.2%)   | 69 (10.0%)  |
| Severe depression                     | 140 (5.1%)   | 34 (4.9%)   |

---

Abbreviations: MCS, mental component measure; PCS, physical component measure; PHQ-9, 9-item patient health questionnaire; SICCA, Sjögren's International Collaborative Clinical Alliance.

The percentages for each variable within each column may not sum up to 100% due to missing data and rounding.
