# Supplementary material for: Predictors of Discordance Between Dry Eye Symptoms and Signs: Insights From the Sjögren's International Collaborative Clinical Alliance
Source: PubMed Central journal article supplement — Invest Ophthalmol Vis Sci. 2024 Oct 4;65(12):3. doi: 10.1167/iovs.65.12.3 (PMC11457922; doi:10.1167/iovs.65.12.3), 2024-10-04
Supplement: iovs-65-12-3_s003.pdf [file iovs-65-12-3_s003.pdf]

Supplementary Table 2. Prediction performance of different models.

| <b>Model</b>                                              | <b>RMSE</b>        | <b>R<sup>2</sup></b> | <b>Adjusted R<sup>2</sup></b> |
|-----------------------------------------------------------|--------------------|----------------------|-------------------------------|
| Rank-score discordance model                              | 0.32 (0.31 - 0.33) | 0.37 (0.34 - 0.39)   | 0.36 (0.33 - 0.38)            |
| Rank-score discordance model in SjD participants          | 0.32 (0.31 - 0.33) | 0.41 (0.37 - 0.45)   | 0.40 (0.36 - 0.44)            |
| Rank-score discordance model in non-SjD participants      | 0.32 (0.31 - 0.33) | 0.29 (0.24 - 0.33)   | 0.27 (0.23 - 0.32)            |
| Rank-score discordance model including ocular symptoms    | 0.30 (0.29 - 0.30) | 0.45 (0.42 - 0.48)   | 0.43 (0.40 - 0.46)            |
| Rank-score discordance model including ocular pathologies | 0.32 (0.31 - 0.33) | 0.37 (0.34 - 0.39)   | 0.36 (0.33 - 0.38)            |
| Raw-score discordance model                               | 3.82 (3.72 - 3.92) | 0.35 (0.32 - 0.38)   | 0.34 (0.31 - 0.37)            |

Abbreviations: RMSE, root mean square error; SjD, Sjögren's disease.
